# Supplementary material
Source: PubMed Central journal article supplement (PMC4323165)
Supplement: NIHMS658916-supplement-supplement_1.pdf [file NIHMS658916-supplement-supplement_1.pdf]

**Supplementary Table 1.** Sex-stratified associations between vitamin D intake and *DKK1* methylation in colorectal carcinomas from Ontario and Newfoundland.

| Variable              | Newfoundland |                   |      |            |                   |       | Ontario    |                   |      |            |                   |      |
|-----------------------|--------------|-------------------|------|------------|-------------------|-------|------------|-------------------|------|------------|-------------------|------|
|                       | Males        |                   |      | Females    |                   |       | Males      |                   |      | Females    |                   |      |
|                       | Total (%)    | OR (95% CI)       | p    | Total (%)  | OR (95% CI)       | p     | Total (%)  | OR (95% CI)       | p    | Total (%)  | OR (95% CI)       | p    |
| <b>Vitamin D (ug)</b> |              |                   |      |            |                   |       |            |                   |      |            |                   |      |
| Overall               |              |                   | 0.03 |            |                   | 0.001 |            |                   | 0.22 |            |                   | 0.16 |
| 0-4                   | 59 (25.4)    | 1.00 (Referent)   |      | 42 (28.0)  | 1.00 (Referent)   |       | 73 (28.0)  | 1.00 (Referent)   |      | 59 (23.5)  | 1.00 (Referent)   |      |
| >4                    | 173 (74.6)   | 0.31 (0.11, 0.89) |      | 108 (72.0) | 0.17 (0.06, 0.47) |       | 188 (72.0) | 0.53 (0.20, 1.45) |      | 192 (76.5) | 1.28 (0.69, 2.38) |      |
| Dietary               |              |                   | 0.04 |            |                   | 0.004 |            |                   | 0.87 |            |                   | 0.98 |
| 0-4                   | 66 (28.2)    | 1.00 (Referent)   |      | 48 (32.0)  | 1.00 (Referent)   |       | 48 (18.4)  | 1.00 (Referent)   |      | 55 (21.9)  | 1.00 (Referent)   |      |
| >4                    | 168 (71.8)   | 0.35 (0.13, 0.95) |      | 102 (68.0) | 0.24 (0.09, 0.63) |       | 213 (81.6) | 0.90 (0.27, 3.05) |      | 196 (78.1) | 0.92 (0.48, 1.75) |      |
| Supplements           |              |                   | 0.93 |            |                   | 0.06  |            |                   | 0.36 |            |                   | 0.90 |
| No                    | 193 (82.8)   | 1.00 (Referent)   |      | 123 (81.5) | 1.00 (Referent)   |       | 196 (75.1) | 1.00 (Referent)   |      | 105 (59.8) | 1.00 (Referent)   |      |
| Yes                   | 40 (17.2)    | 0.95 (0.26, 3.51) |      | 28 (18.5)  | 0.24 (0.05, 1.09) |       | 65 (24.9)  | 0.55 (0.16, 1.96) |      | 101 (40.2) | 0.97 (0.61, 1.55) |      |

**Supplementary Table 2.** Stage-stratified associations between vitamin D intake and *DKK1* methylation in colorectal carcinomas from Ontario and Newfoundland.

| Variable              | Newfoundland |                   |       |              |                   |       | Ontario    |                   |      |              |                   |      |
|-----------------------|--------------|-------------------|-------|--------------|-------------------|-------|------------|-------------------|------|--------------|-------------------|------|
|                       | Stage I/II   |                   |       | Stage III/IV |                   |       | Stage I/II |                   |      | Stage III/IV |                   |      |
|                       | Total (%)    | OR (95% CI)       | p     | Total (%)    | OR (95% CI)       | p     | Total (%)  | OR (95% CI)       | p    | Total (%)    | OR (95% CI)       | p    |
| <b>Vitamin D (ug)</b> |              |                   |       |              |                   |       |            |                   |      |              |                   |      |
| Overall               |              |                   | 0.003 |              |                   | 0.006 |            |                   | 0.05 |              |                   | 0.87 |
| 0-4                   | 64 (27.4)    | 1.00 (Referent)   |       | 37 (25.0)    | 1.00 (Referent)   |       | 79 (26.5)  | 1.00 (Referent)   |      | 45 (24.3)    | 1.00 (Referent)   |      |
| >4                    | 170 (72.6)   | 0.27 (0.11, 0.65) |       | 111 (75.0)   | 0.17 (0.05, 0.60) |       | 219 (73.5) | 0.48 (0.22, 1.01) |      | 140 (75.7)   | 0.91 (0.30, 2.76) |      |
| Dietary               |              |                   | 0.004 |              |                   | 0.06  |            |                   | 0.85 |              |                   | 0.21 |
| 0-4                   | 69 (29.2)    | 1.00 (Referent)   |       | 45 (30.4)    | 1.00 (Referent)   |       | 59 (19.8)  | 1.00 (Referent)   |      | 37 (20.0)    | 1.00 (Referent)   |      |
| >4                    | 167 (70.8)   | 0.29 (0.12, 0.68) |       | 103 (69.6)   | 0.30 (0.09, 1.06) |       | 239 (80.2) | 1.09 (0.45, 2.67) |      | 148 (80.0)   | 2.69 (0.58, 12.5) |      |
| Supplements           |              |                   | 0.31  |              |                   | 0.15  |            |                   | 0.32 |              |                   | 0.83 |
| No                    | 191 (81.3)   | 1.00 (Referent)   |       | 125 (83.9)   | 1.00 (Referent)   |       | 207 (69.5) | 1.00 (Referent)   |      | 115 (62.2)   | 1.00 (Referent)   |      |
| Yes                   | 44 (18.7)    | 0.56 (0.18, 1.72) |       | 24 (16.1)    | 0.21 (0.03, 1.78) |       | 91 (30.5)  | 0.69 (0.33, 1.44) |      | 70 (37.8)    | 1.10 (0.43, 2.86) |      |
